# Supplementary material for: Probing the molecular determinants of the activation of toll-like receptor 2/6 by amyloid nanostructures through directed peptide self-assembly
Source: Royal Society of Chemistry journal article supplement (doi:10.1039/d4sm00638k), 2024-01-01
Supplement: d4sm00638k1.pdf [file d4sm00638k1.pdf]

## Supporting Information

### **Probing the molecular determinants of the activation of toll-like receptor 2/6 by amyloid nanostructures through directed peptide self-assembly**

Nadjib Kihal<sup>a,b,c</sup>, Marie-Jeanne Archambault<sup>a,b</sup>, Margaryta Babych<sup>a,b</sup>, Ali Nazemi<sup>a,c</sup>, and Steve Bourgault<sup>\*a,b</sup>

*<sup>a</sup>Department of Chemistry, Université du Québec à Montréal. C.P.8888, Succursale Centre-Ville, Montréal, H3C 3P8, Canada*

*<sup>b</sup>Quebec Network for Research on Protein Function, Engineering and Applications (PROTEO), Québec, Canada*

*<sup>c</sup>Quebec Centre for Advanced Materials, QCAM, Montreal, Canada*

\*Corresponding authors: Steve Bourgault, C.P. 8888, Succursale Centre-Ville, Montréal, H3C 3P8, Canada; e-mail address: [bourgault.steve@uqam.ca](mailto:bourgault.steve@uqam.ca)

## **TABLE OF CONTENTS**

|                                                                                                                |    |
|----------------------------------------------------------------------------------------------------------------|----|
| <b>Fig. S1</b> HPLC and MS analysis of <i>C</i> -amidated I <sub>10</sub> peptides.....                        | 3  |
| <b>Fig. S2</b> HPLC and MS analysis of <i>C</i> -carboxylated I <sub>10</sub> peptides.....                    | 4  |
| <b>Fig. S3</b> Effect of adding 1% acetic acid to peptide assemblies for adsorption to AFM mica.....           | 5  |
| <b>Fig. S4</b> AFM image and topography analysis of IAPP amyloid fibrils.....                                  | 6  |
| <b>Fig. S5</b> Effect of diluting peptide assemblies.....                                                      | 7  |
| <b>Fig. S6</b> Effect of lyophilisation on the stability of peptide assemblies.....                            | 8  |
| <b>Fig. S7</b> ATR-FTIR spectra of <i>C</i> -carboxylated and <i>C</i> -amidated I <sub>10</sub> peptides..... | 9  |
| <b>Fig. S8</b> ANS fluorescence spectra of I <sub>10</sub> peptides.....                                       | 10 |
| <b>Fig. S9</b> Cytocompatibility of monomeric and assembled peptides.....                                      | 11 |

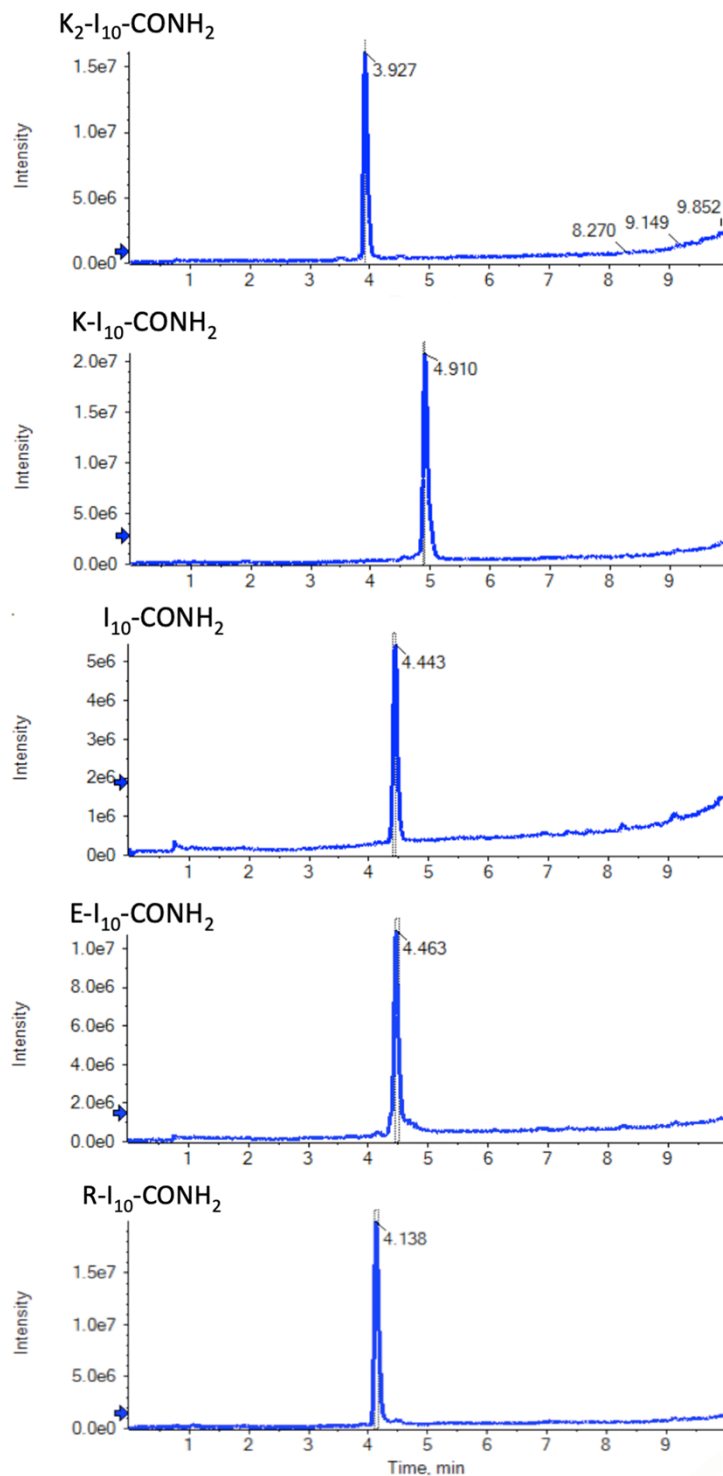

| Peptides                                           | Formula                                                          | Exact mass | Calculated m/z | RT (min) | PPM Error | Observed m/z | Purity (%) |
|----------------------------------------------------|------------------------------------------------------------------|------------|----------------|----------|-----------|--------------|------------|
| K <sub>2</sub> -I <sub>10</sub> -CONH <sub>2</sub> | C <sub>65</sub> H <sub>109</sub> N <sub>21</sub> O <sub>23</sub> | 1551.8005  | 776.9075       | 3.92     | 0.1       | 776.9076     | >98        |
| K-I <sub>10</sub> -CONH <sub>2</sub>               | C <sub>59</sub> H <sub>97</sub> N <sub>19</sub> O <sub>22</sub>  | 1423.7056  | 712.8601       | 4.91     | 0.1       | 712.8602     | >98        |
| I <sub>10</sub> -CONH <sub>2</sub>                 | C <sub>53</sub> H <sub>85</sub> N <sub>17</sub> O <sub>21</sub>  | 1295.6106  | 648.8126       | 4.43     | 0.6       | 648.813      | >98        |
| R-I <sub>10</sub> -CONH <sub>2</sub>               | C <sub>59</sub> H <sub>96</sub> N <sub>21</sub> O <sub>22</sub>  | 1451.7171  | 726.8631       | 4.13     | 0.3       | 726.8637     | >98        |
| E-I <sub>10</sub> -CONH <sub>2</sub>               | C <sub>58</sub> H <sub>92</sub> N <sub>18</sub> O <sub>24</sub>  | 1424.6532  | 713.3339       | 4.46     | 0.8       | 713.3345     | >98        |

**Fig. S1** HPLC and MS analysis of C-amidated I<sub>10</sub> peptides.

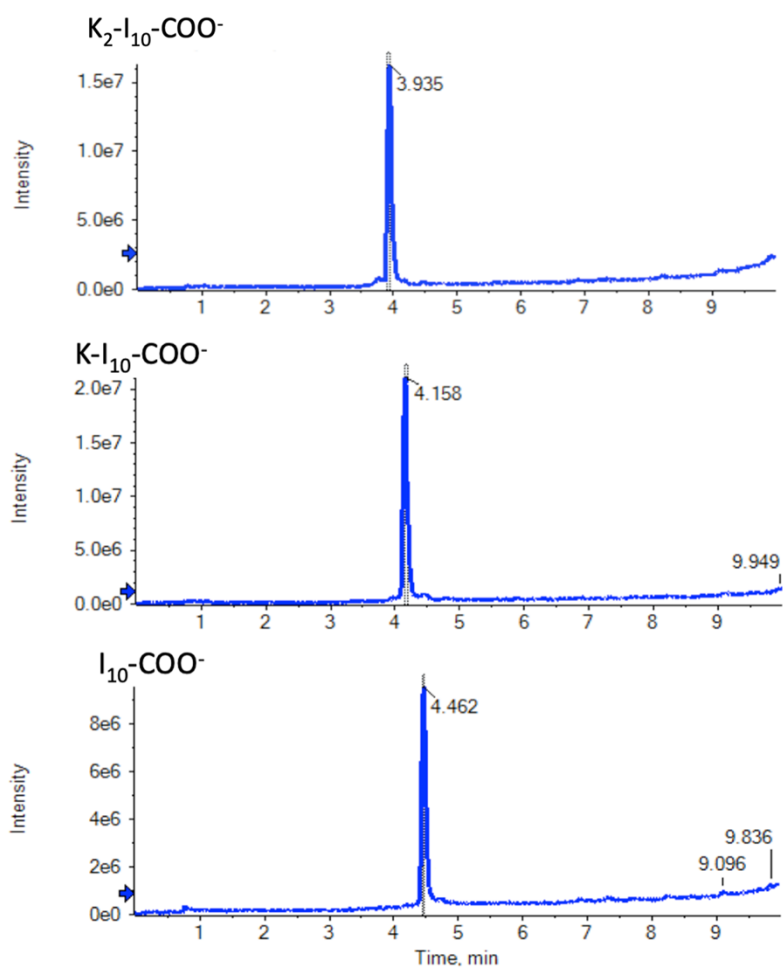

| Peptides           | Formula                     | Exact mass | Calculated $m/z$ | RT (min) | PPM Error | Observed $m/z$ | Purity (%) |
|--------------------|-----------------------------|------------|------------------|----------|-----------|----------------|------------|
| $K_2-I_{10}-COO^-$ | $C_{65}H_{108}N_{20}O_{24}$ | 1552.7845  | 777.3995         | 3.93     | 1.7       | 777.4009       | >98        |
| $K-I_{10}-COO^-$   | $C_{59}H_{96}N_{18}O_{23}$  | 1424.6896  | 713.3521         | 4.15     | 0.8       | 713.3526       | >98        |
| $I_{10}-COO^-$     | $C_{53}H_{84}N_{16}O_{22}$  | 1296.5946  | 649.3046         | 4.45     | -1        | 649.304        | >98        |

**Fig. S2** HPLC and MS analysis of C-carboxylated  $I_{10}$  peptides.

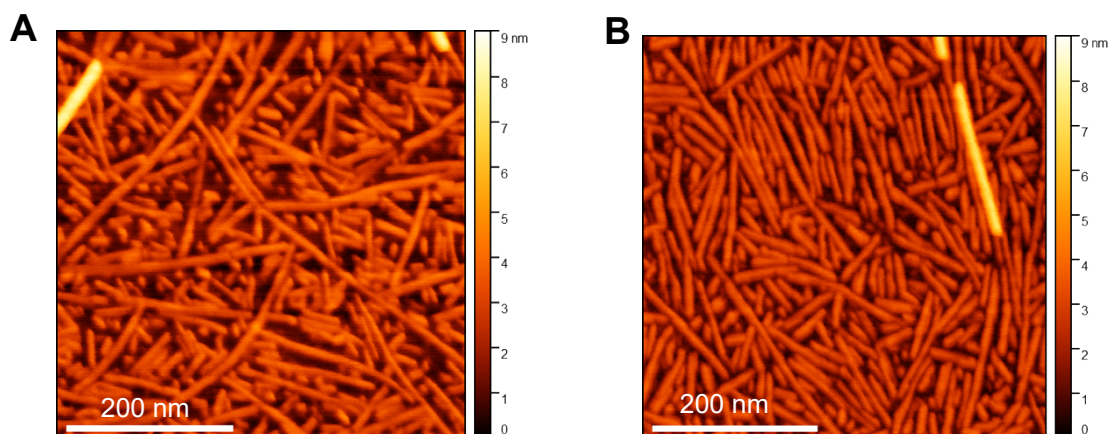

**Fig. S3.** Effect of adding 1% acetic acid to peptide assemblies for adsorption to AFM mica. K-I<sub>10</sub>-CONH<sub>2</sub> peptide was assembled for 1 week in 20 mM Tris-HCl buffer (pH 7.4) at a peptide concentration of 1 mM and under continuous rotatory agitation at RT. Peptide assemblies were diluted to reach a final concentration of 50  $\mu$ M in (A) 1% acetic acid and (B) deionized water and immediately spotted onto a freshly cleaved mica.

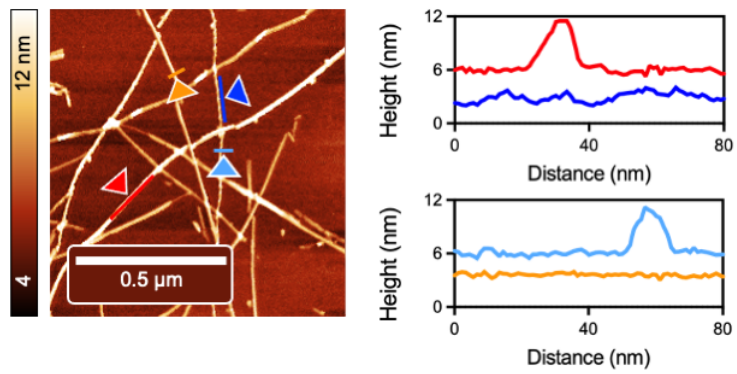

**Fig. S4** AFM image and topography analysis of IAPP amyloid fibrils.

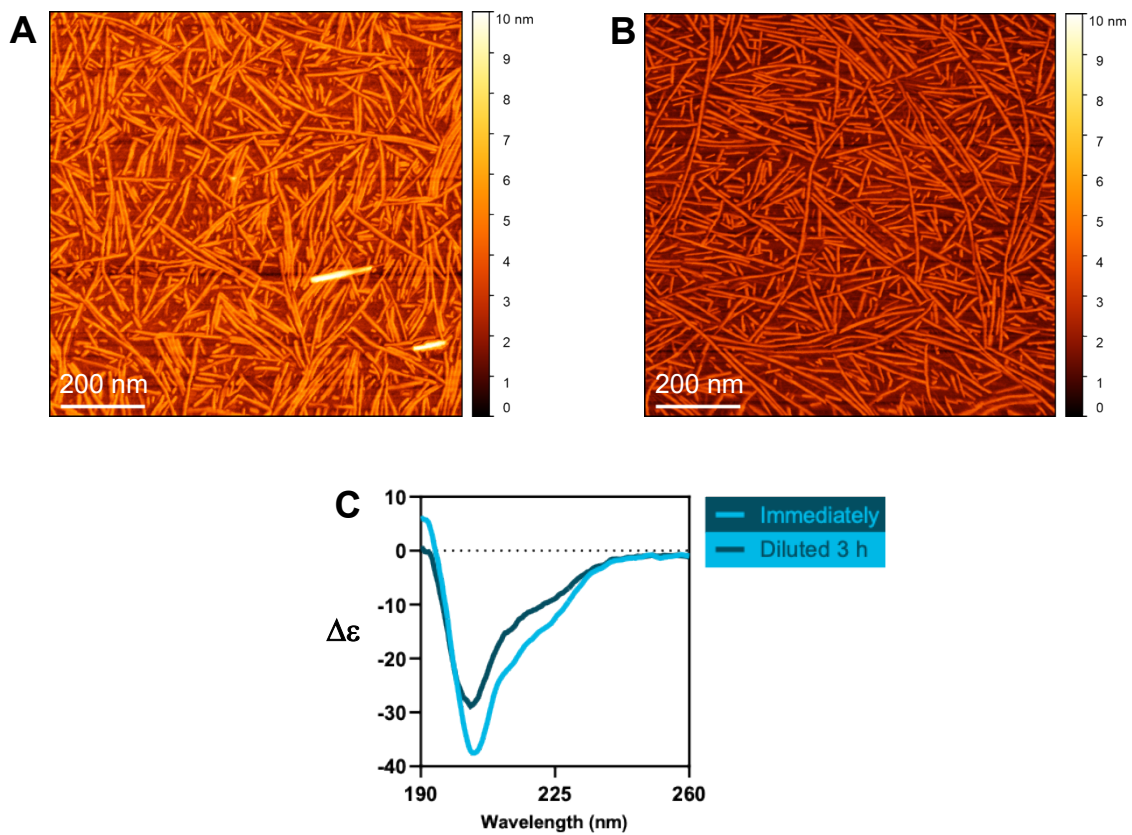

**Fig. S5.** Effect of diluting peptide assemblies. K-I<sub>10</sub>-CONH<sub>2</sub> peptide was assembled for 1 week in 20 mM Tris-HCl buffer (pH 7.4) at a peptide concentration of 1 mM and under continuous rotatory agitation at RT. Peptide assemblies were diluted in 20 mM Tris-HCl, pH 7.4, to reach a final concentration of 50  $\mu$ M. The 50  $\mu$ M peptide solution was analysed immediately (A) or after 3 h incubation at RT under quiescent conditions (B) by AFM imaging (A,B) and CD spectroscopy (C).

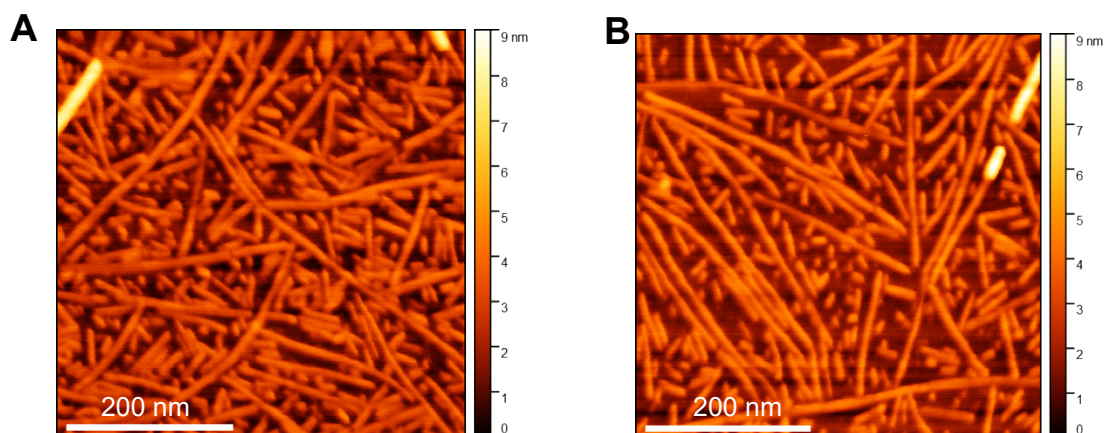

**Fig. S6.** Effect of lyophilisation on the stability of peptide assemblies. K-I<sub>10</sub>-CONH<sub>2</sub> peptide was assembled for 1 week in 20 mM Tris-HCl buffer (pH 7.4) at a peptide concentration of 1 mM and under continuous rotatory agitation at RT. Peptide assemblies were immediately (A) analysed by AFM imaging or lyophilised (B) before being resuspended in deionized water and analysed by AFM.



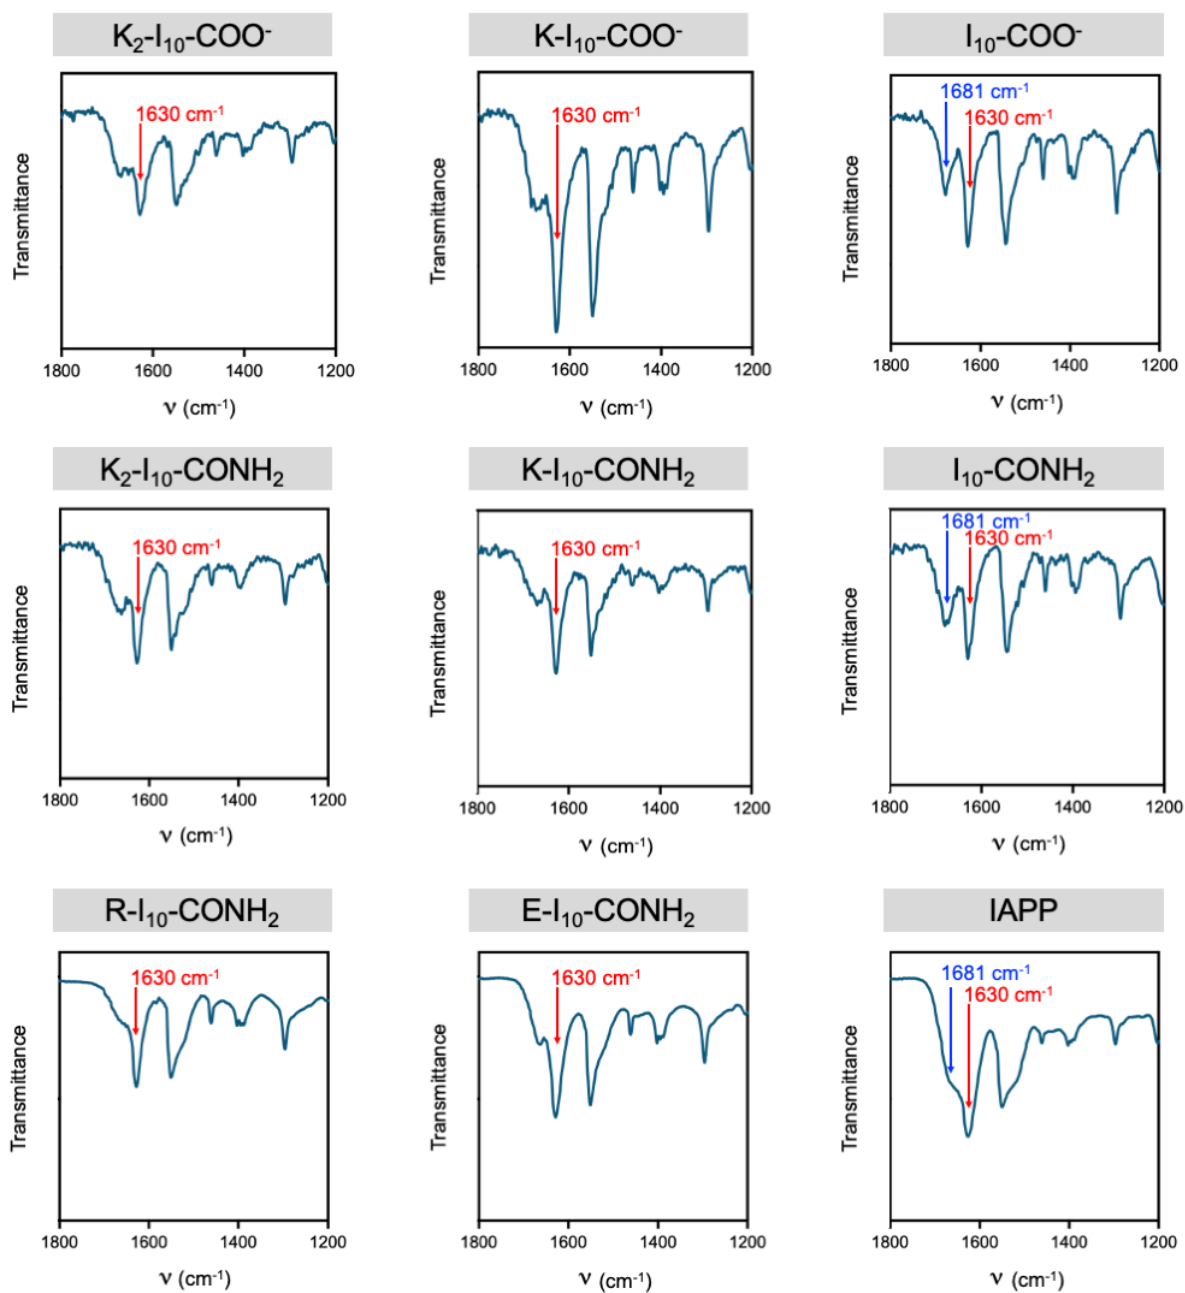

**Fig. S7** ATR-FTIR spectra of *C*-carboxylated and *C*-amidated I<sub>10</sub> peptides. Data were acquired after 1 week of incubation in 20 mM Tris-HCl buffer (pH 7.4) at RT.

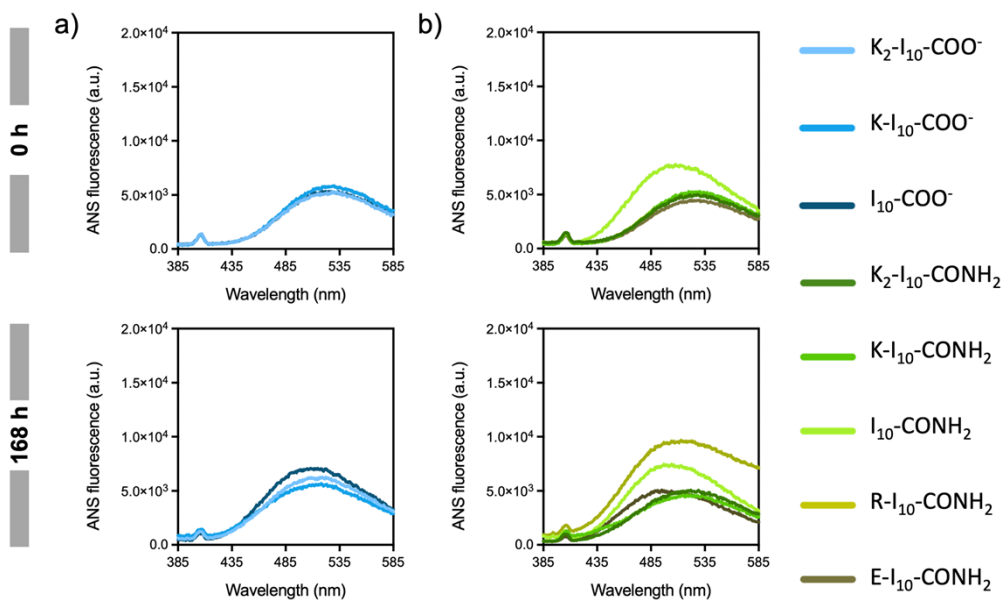

**Fig. S8** ANS fluorescence spectra of I<sub>10</sub> peptides. The data were acquired at 0 h and after 1 week of incubation in 20 mM Tris-HCl buffer (pH 7.4) at RT.

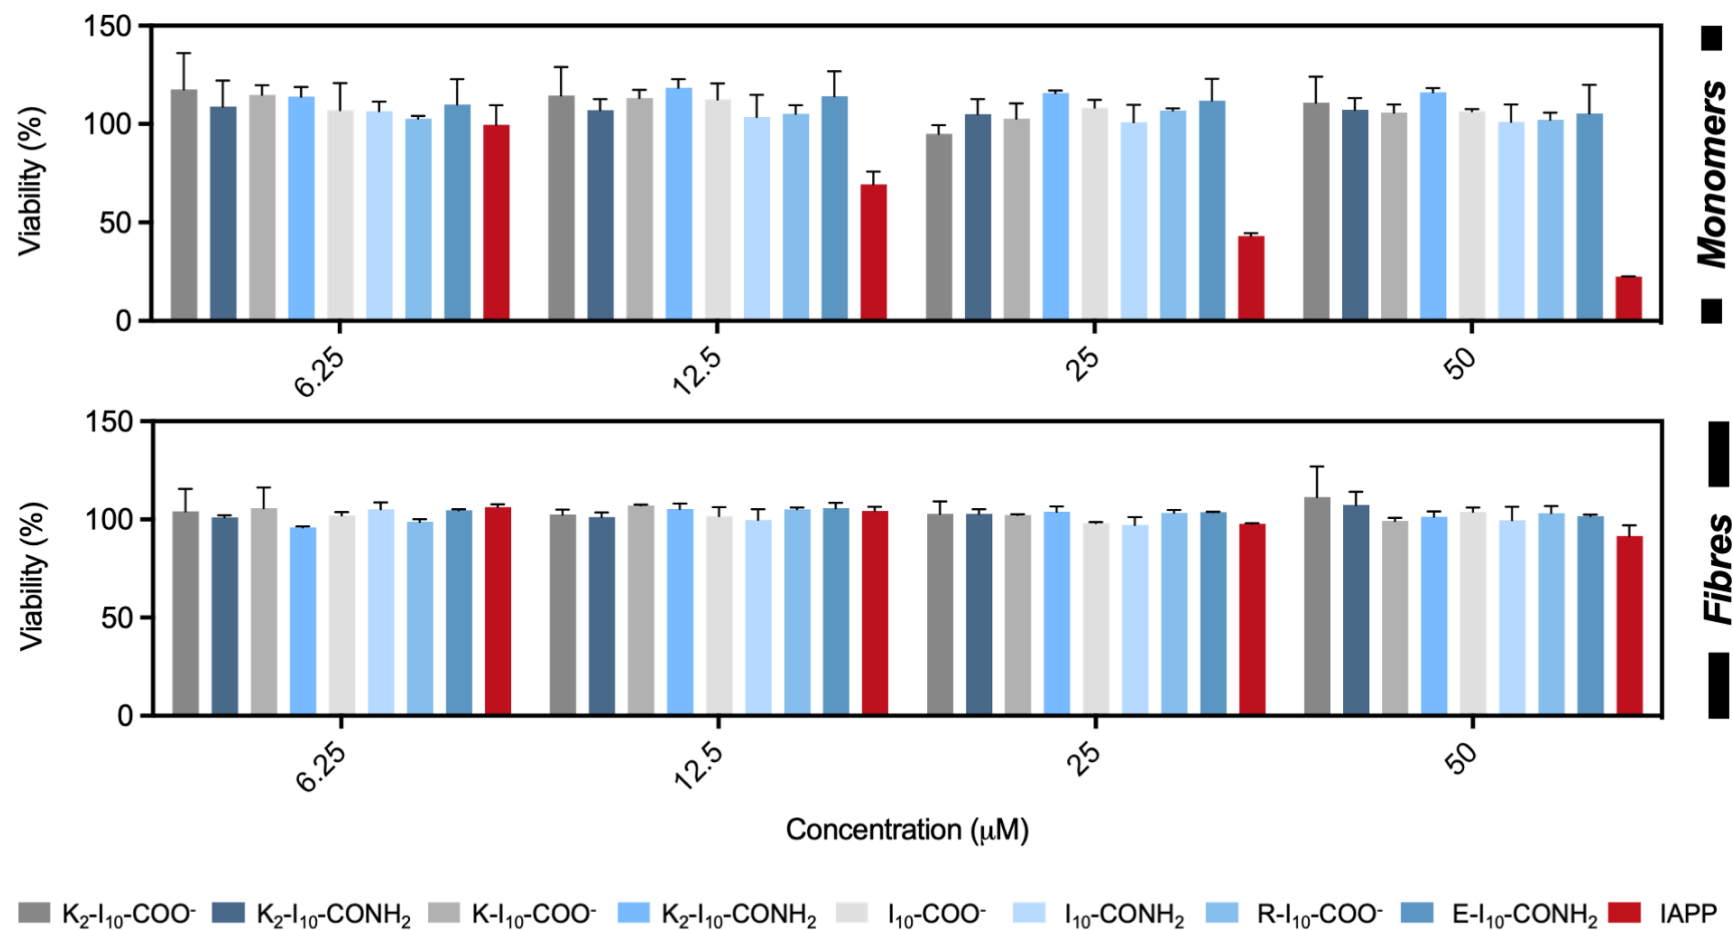

**Fig. S9** Cytocompatibility of monomeric and assembled peptides. DC.2.4 cells were incubated for 24 h with increasing concentrations of monomeric (0 h pre-incubation) or assembled (168 h pre-incubation) peptides, and viability was measured by means of the resazurin-based metabolic assay. Data represent the Mean  $\pm$  S.E.M. of at least three individual experiments performed in triplicate.
